# Supplementary material for: The chloroplast 2-cysteine peroxiredoxin functions as thioredoxin oxidase in redox regulation of chloroplast metabolism
Source: eLife journal article supplement (doi:10.7554/elife.38194), 2018-10-12
Supplement: supp [file elife-38194-supp-v1.zip]

Archive with 16 entries (16 files):
- elife_poa_e38194_Figure_3_figure_supplement_1.pdf
- elife_poa_e38194_Figure_5_figure_supplement_1.pdf
- elife_poa_e38194_Figure_2_source_data_1.docx
- elife_poa_e38194_Figure_6_figure_supplement_2.pdf
- elife_poa_e38194_Figure_5_figure_supplement_3.pdf
- elife_poa_e38194_Figure_6_figure_supplement_3.pdf
- elife_poa_e38194_Figure_3_source_data_1.docx
- elife_poa_e38194_Figure_4_source_data_1.docx
- elife_poa_e38194_Figure_1_figure_supplement_1.pdf
- elife_poa_e38194_Supplementary_File_1.docx
- elife_poa_e38194_Transparent_Reporting_File.docx
- elife_poa_e38194_Figure_5_source_data_1.docx
- elife_poa_e38194_Figure_7_source_data_1.docx
- elife_poa_e38194_Figure_2_figure_supplement_1.pdf
- elife_poa_e38194_Figure_6_figure_supplement_1.pdf
- elife_poa_e38194_Figure_5_figure_supplement_2.pdf
