# Supplementary material for: The chloroplast 2-cysteine peroxiredoxin functions as thioredoxin oxidase in redox regulation of chloroplast metabolism
Source: eLife journal article supplement (doi:10.7554/elife.38194), 2018-10-12
Supplement: supp [file elife-38194-supp-v1.zip › elife_poa_e38194_Figure_4_source_data_1.docx]

**Figure 4 – Source data.** Values of the MDH activity test shown in figure 4B. Experiments were performed with aliquots from three different stroma extracts. The experiment-specific background was subtracted from each value. Exp: experiment; MDH: malate dehydrogenase; ox: oxidized; SD: standard deviation of the mean (n-1); Str: Stroma; Trx: thioredoxin. The background was subtracted and the result normalized (n). *The % of MDH represents a mean calculated from the % of normalized value of each experiment. The letters above the columns designate groups of statistically significant difference (p<0.05), according to post hoc Tukey’s HSD.

| Δ 10-3 Abs/min | Exp 1 | Exp 2 | Exp 3 | Exp 4 | *% of MDH activationn | ±SDn | |
| --- | --- | --- | --- | --- | --- | --- | --- |
| DTT | -2.30 | -4.70 | -5.55 | -5.00 | 100.0a | 0.0 |
| Trx-m1 + DTT |  | -4.27 | -6.11 | -3.89 | 92.9a | 13.3 |
| Trx-m4 + 2-CysPrxox | -1.90 | -3.53 | -2.79 |  | 69.3ab | 13.7 |
| Trx-x + 2-CysPrxox |  | -1.78 | -2.30 | -2.00 | 39.7bc | 1.5 |
| Trx-f1 + 2-CysPrxox | -1.11 | -1.55 | -1.47 |  | 35.8c | 9.0 |
| CDSP32 + 2-CysPrxox | -0.87 | -0.33 | -0.87 |  | 20.1cd | 12.8 |
| Trx-m1 + 2-CysPrxox | -0.19 | 0.28 | -0.24 |  | 2.2d | 2.3 |
