# Supplementary figures and images for: The chloroplast 2-cysteine peroxiredoxin functions as thioredoxin oxidase in redox regulation of chloroplast metabolism
Source: eLife journal article supplement (doi:10.7554/elife.38194), 2018-10-12

Figure 5: Supplementary Figure 3

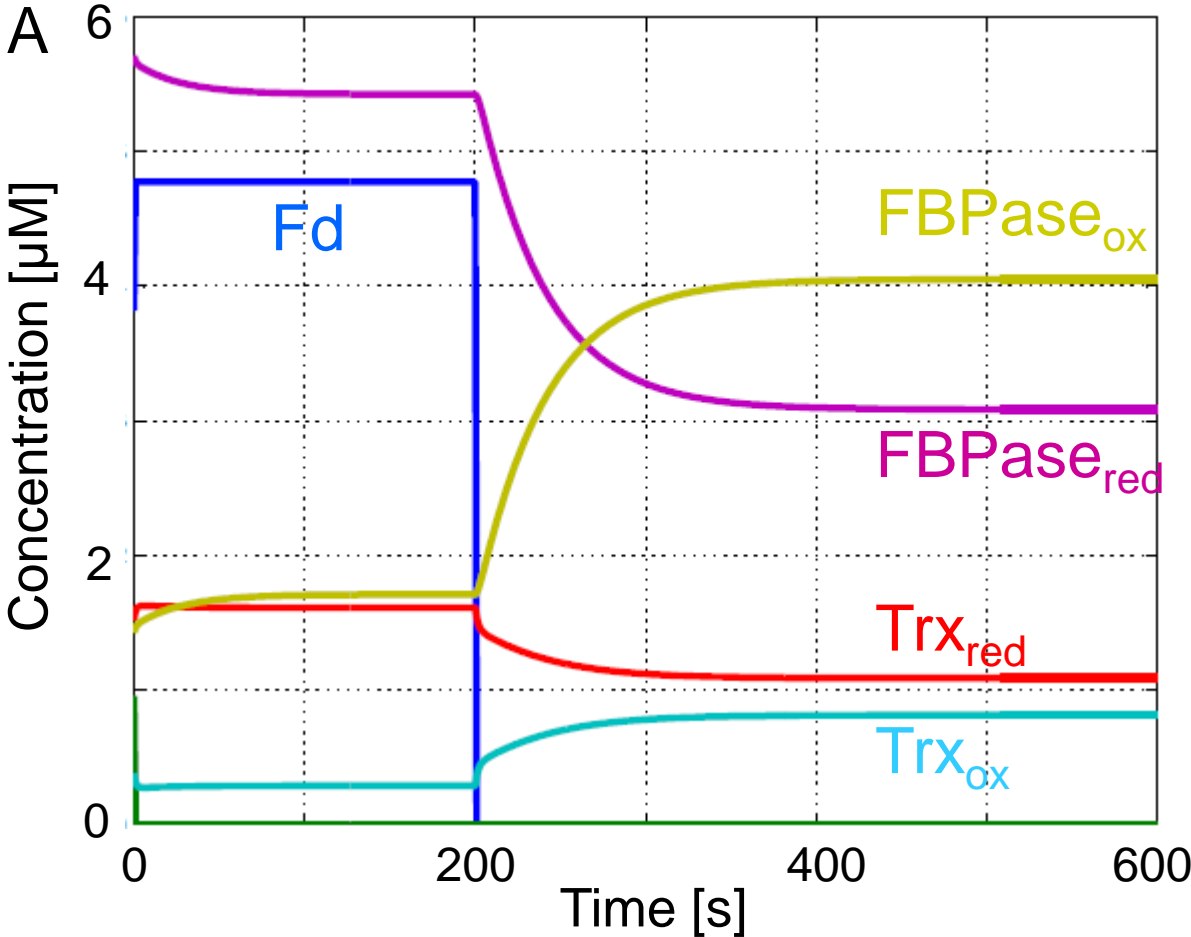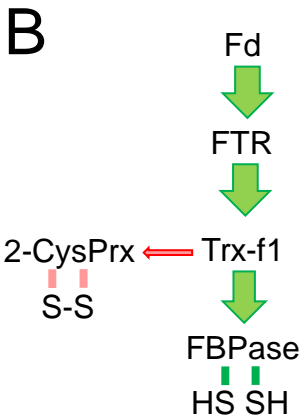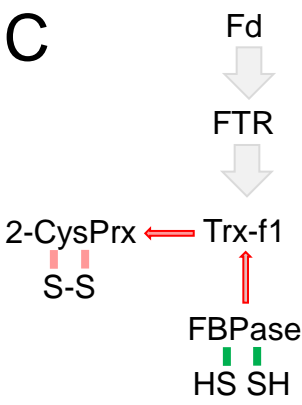

Supplement: supp [file elife-38194-supp-v1.zip]

Figure 5: Supplementary Figure 1

A

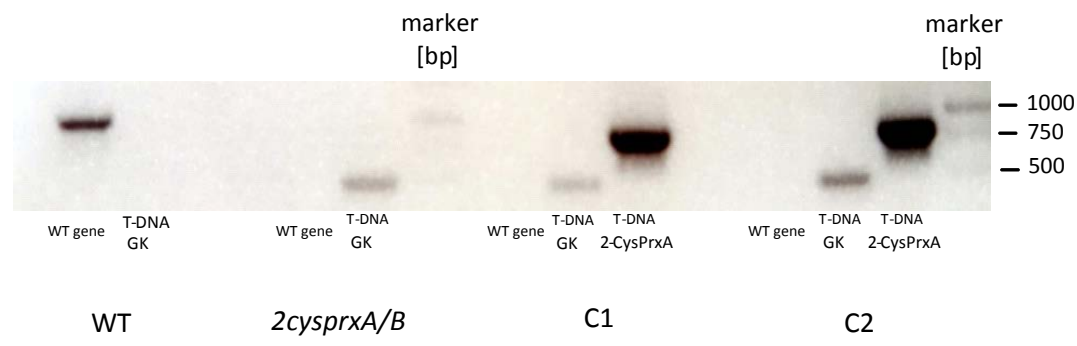

B

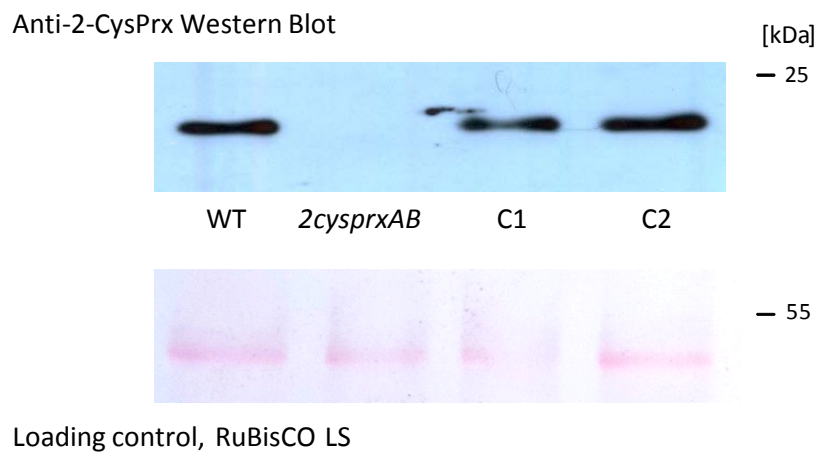

Supplement: supp [file elife-38194-supp-v1.zip]

Figure 1: Supplementary Figure 1

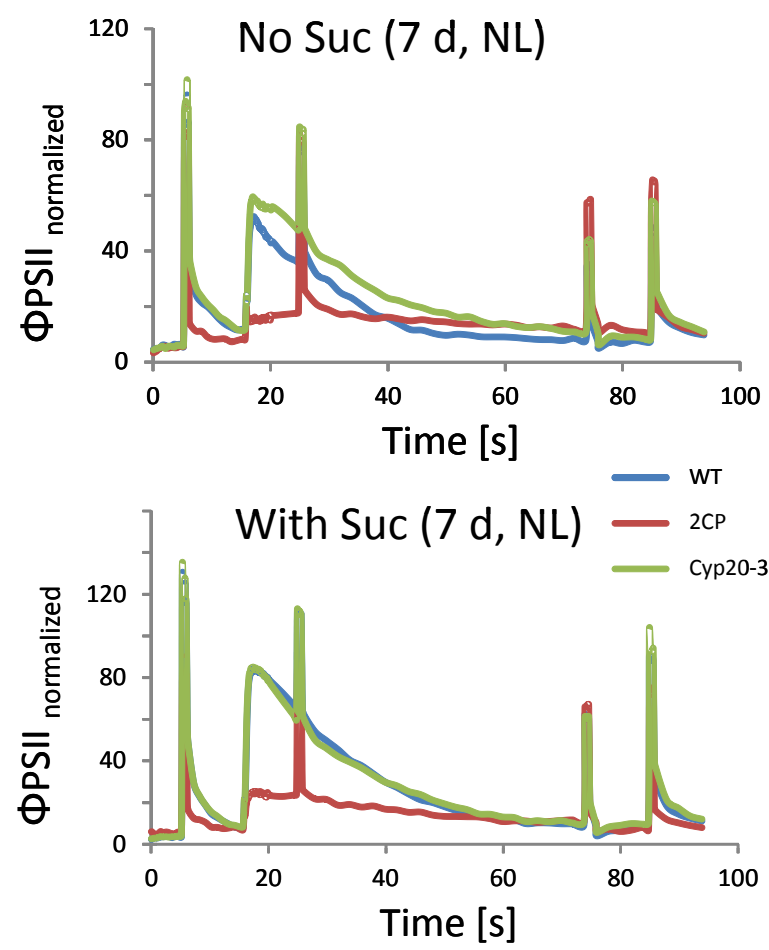

Supplement: supp [file elife-38194-supp-v1.zip]

Figure 3: Supplementary Figure 1

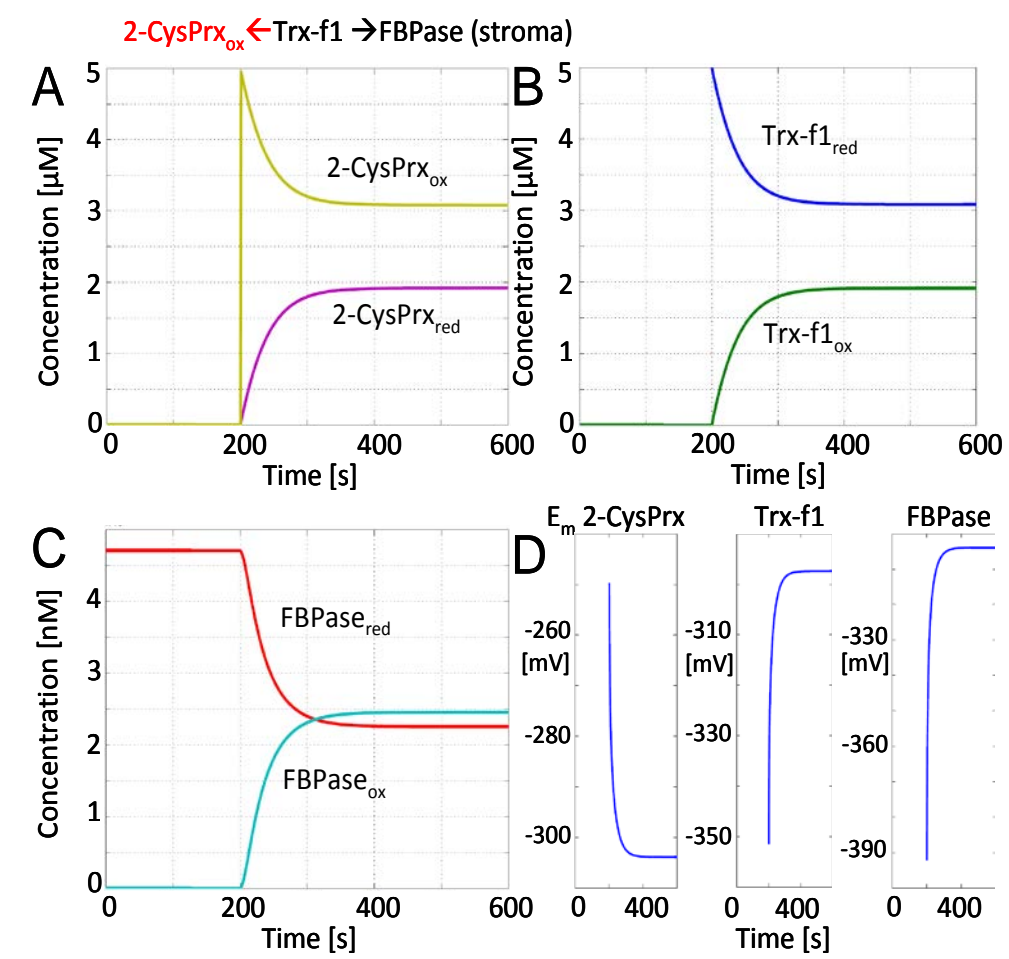

Supplement: supp [file elife-38194-supp-v1.zip]

Figure 2: Supplementary Figure 1

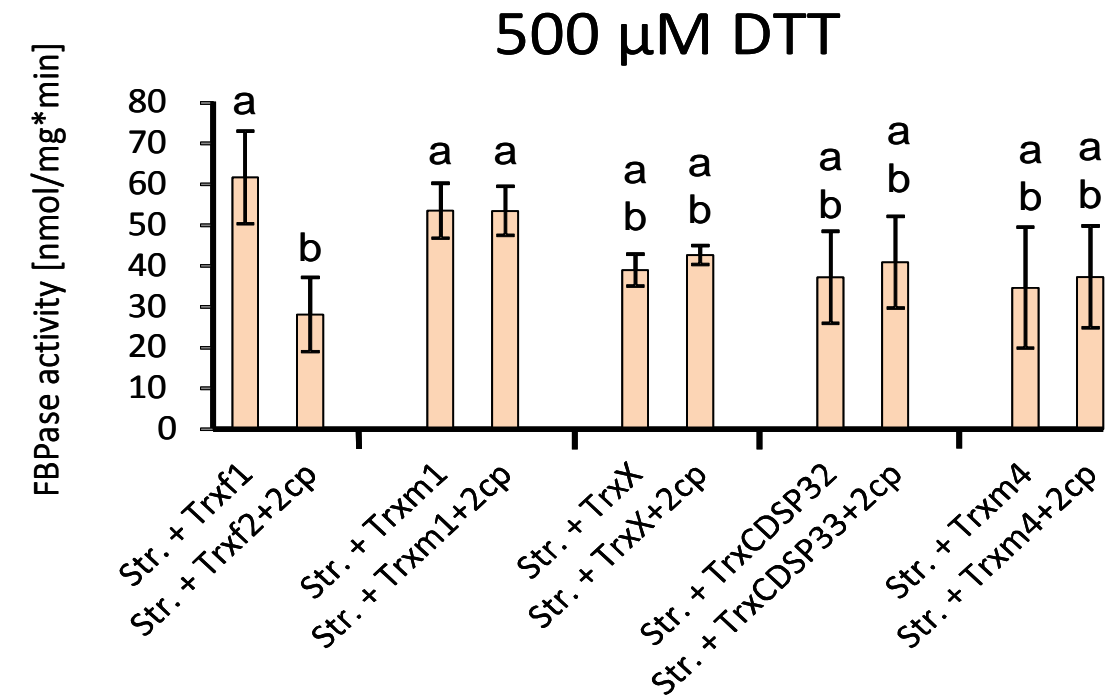

Supplement: supp [file elife-38194-supp-v1.zip]

Figure 6: Supplementary Figure 2

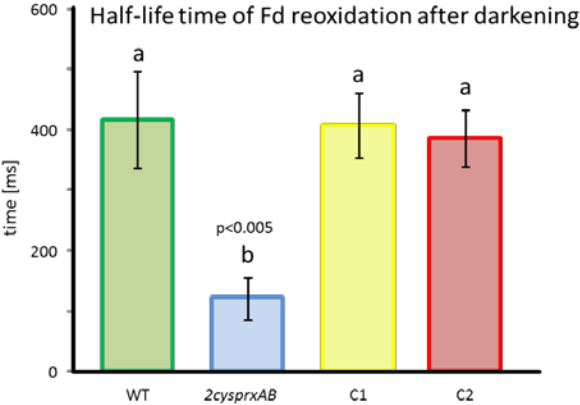

Supplement: supp [file elife-38194-supp-v1.zip › elife_poa_e38194_Figure_6_figure_supplement_2.pdf]

Figure 6: Supplementary Figure 3

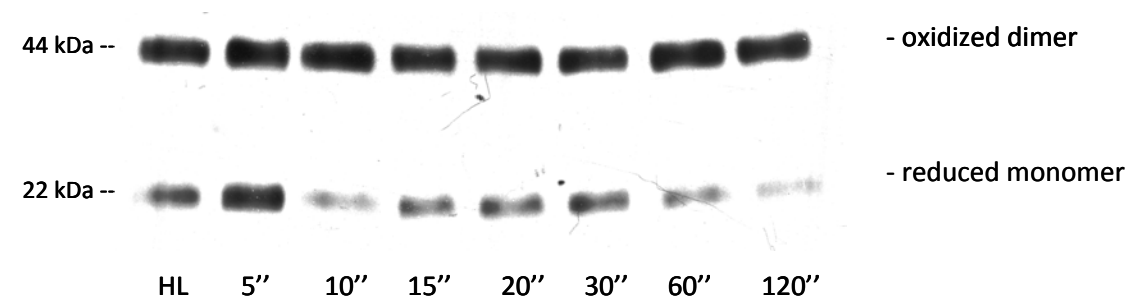

Supplement: supp [file elife-38194-supp-v1.zip › elife_poa_e38194_Figure_6_figure_supplement_3.pdf]

Figure 6: Supplementary Figure 1

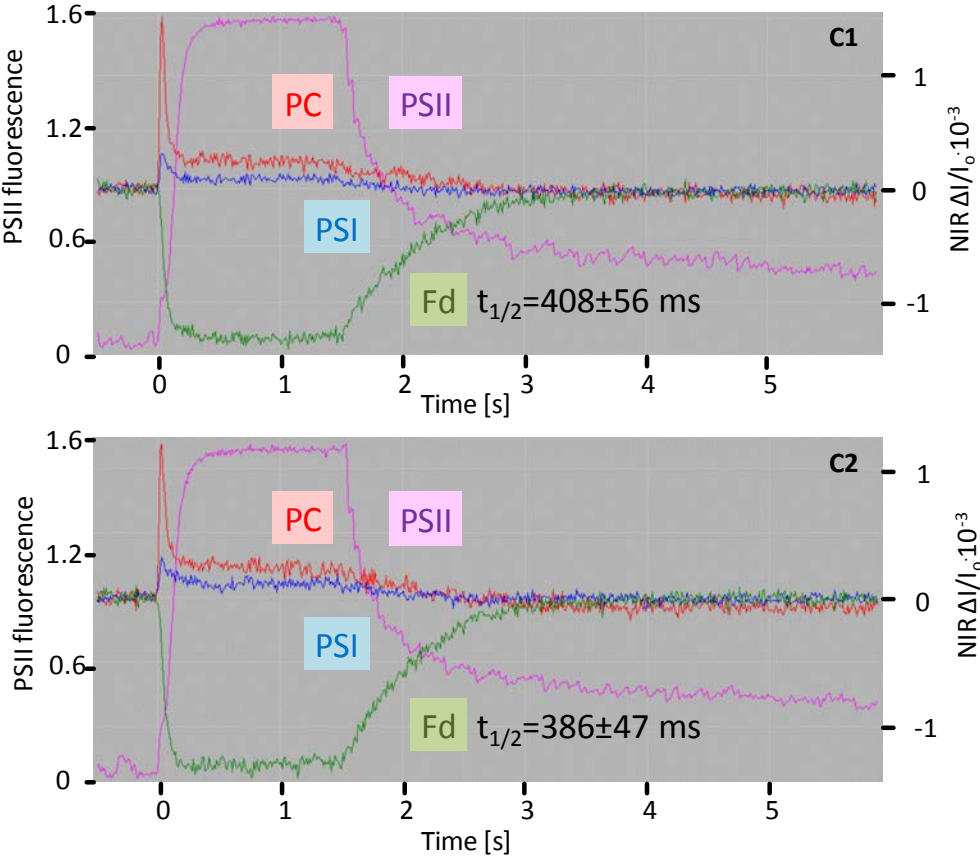

Supplement: supp [file elife-38194-supp-v1.zip › elife_poa_e38194_Figure_6_figure_supplement_1.pdf]

Figure 5: Supplementary Figure 2

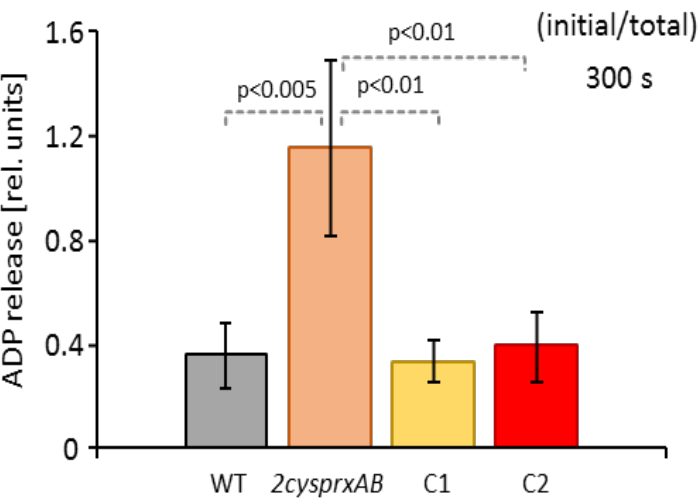

Supplement: supp [file elife-38194-supp-v1.zip › elife_poa_e38194_Figure_5_figure_supplement_2.pdf]
